# Supplementary material for: Aggregation pheromone 4-vinylanisole promotes the synchrony of sexual maturation in female locusts
Source: eLife. 2022 Mar 8;11:e74581. doi: 10.7554/eLife.74581 (PMC8903828; doi:10.7554/eLife.74581)
Supplement: Figure 1—figure supplement 1—source data 1. [file elife-74581-fig1-figsupp1-data1.xlsx]

## Sheet: Sheet1
Figure 1-S1
S 2day	G 2day	S 4day	G 4day	S 6day	G 6day	S 8day	G 8day
0.07	0.12	0.11	0.17	0.14	0.55	0.72	4.46
0.09	0.15	0.12	0.18	0.17	0.6	0.75	4.66
0.1	0.16	0.13	0.2	0.17	0.64	0.77	4.79
0.1	0.17	0.14	0.21	0.18	0.67	0.77	4.81
0.1	0.17	0.14	0.22	0.19	0.7	0.77	4.82
0.1	0.18	0.14	0.24	0.19	0.66	0.78	4.88
0.11	0.2	0.14	0.26	0.2	0.66	0.81	5.04
0.11	0.21	0.14	0.27	0.21	0.66	0.88	5.48
0.11	0.22	0.15	0.32	0.21	0.56	0.91	5.65
0.11	0.23	0.15	0.37	0.21	0.73	0.99	6.19
0.11	0.11	0.15	0.38	0.21	0.62	0.95	5.9
0.12	0.13	0.15	0.38	0.21	0.67	0.95	5.92
0.12	0.12	0.16	0.41	0.22	0.75	0.96	5.99
0.12	0.14	0.16	0.43	0.22	0.59	1.04	6.49
0.12	0.15	0.16	0.45	0.22	0.61	0.86	5.35
0.13	0.11	0.17	0.4	0.22	0.61	0.99	6.14
0.13	0.11	0.17	0.4	0.22	0.63	0.88	5.5
0.14	0.11	0.17	0.41	0.23	0.57	0.67	4.19
0.14	0.1	0.18	0.25	0.24	0.62	1.06	6.63
0.15	0.13	0.18	0.28	0.24	0.57	0.68	4.22
0.15	0.13	0.19	0.28	0.25	0.57	1.05	6.56
0.16	0.1	0.19	0.42	0.25	0.55	1.07	6.66
0.16	0.09	0.2	0.4	0.25	0.5	1	6.24
0.16	0.09	0.2	0.29	0.26	0.77	0.8	4.96
0.2	0.15	0.2	0.22	0.26		1.03	6.43
0.27	0.15	0.2	0.26	0.26		1.01	6.32
	0.13	0.21	0.28	0.29		0.81	5.02
	0.13	0.21	0.23	0.29		0.76	4.74
	0.14	0.21	0.24	0.3		0.79	4.94
	0.13	0.22	0.31	0.3		1.06	6.59
	0.12	0.23	0.22	0.3		1.06	6.6
	0.16	0.23	0.23	0.31		0.99	6.15
	0.11	0.23	0.26	0.34		0.84	5.22
	0.1	0.24	0.28	0.34		0.93	5.82
		0.25	0.3	0.34		1.06	6.6
		0.26	0.27	0.36		0.71	4.43
		0.28		0.37		0.79	4.9
		0.28		0.38		0.73	4.57
		0.29		0.45		0.93	5.82
		0.32		0.46		1.05	6.53
		0.36		0.49		0.65
				0.5		0.65
				0.53		0.68
				0.55		0.68
				0.65		0.69
				0.67		0.7
						0.71
						0.75
						0.91
						0.92
						0.93
						0.98
