# Supplementary material for: Aggregation pheromone 4-vinylanisole promotes the synchrony of sexual maturation in female locusts
Source: eLife. 2022 Mar 8;11:e74581. doi: 10.7554/eLife.74581 (PMC8903828; doi:10.7554/eLife.74581)
Supplement: Figure 1—source data 1. [file elife-74581-fig1-data1.xlsx]

## Sheet: Sheet1
fig 1A			FIG 1B									FIG 1C			FIG 1D			FIG 1E			FIG 1F			FIG 1G			FIG 1H			FIG 1I
G	S		S 2day	G 2day	S 4day	G 4day	S 6day	G 6day	S 8day	G 8day		G♀	G♂		S♀	S♂		G♀	G♂		S♂	G♂		Orco-/-♀	WT♀		WT	ORCO		G♂+Gwt♀	G♂+GOrco-/-♀
8	8		0.07	0.12	0.11	0.17	0.14	0.55	0.72	4.46		0.490528	0.359046		0.163388	0.280093		0.417402	0.587574		0.748583	0.665222		8	8		0.655001	0.640552		0.655001	0.640552
9	8		0.09	0.15	0.12	0.18	0.17	0.6	0.75	4.66		0.515813	0.436924		0.18006	0.573525		0.260074	0.691925		0.643548	0.55852		8	9		0.626104	0.56831		0.626104	0.402954
9	9		0.1	0.16	0.13	0.2	0.17	0.64	0.77	4.79		0.489517	0.456141		0.186729	0.303434		0.24402	0.590785		0.673558	0.616872		9	9		0.820356	0.581153		0.820356	0.359608
9	9		0.1	0.17	0.14	0.21	0.18	0.67	0.77	4.81		0.446027	0.539075		0.191731	0.511837		0.309841	0.545834		0.608536	0.771924		10	9		0.736876	0.73206		0.587574	0.804302
9	10		0.1	0.17	0.14	0.22	0.19	0.7	0.77	4.82		0.492551	0.461198		0.198399	0.433478		0.28576	0.595601		0.403468	1.00033		10	9		0.748114	0.537807		0.648579	0.471986
9	12		0.1	0.18	0.14	0.24	0.19	0.66	0.78	4.88		0.454118	0.482437		0.218406	0.27009		0.284155	0.480013		0.225075	0.765255		11	9		0.903837	0.56831		0.584363	0.330711
9	12		0.11	0.2	0.14	0.26	0.2	0.66	0.81	5.04		0.441981	0.485471		0.225075	0.253418		0.24402	0.531385		0.27009	0.986996		11	9		0.887783	0.459143		0.524964	0.348371
9	13		0.11	0.21	0.14	0.27	0.21	0.66	0.88	5.48		0.385343	0.505699		0.228409	0.321774		0.207096	0.492856		0.236746	1.012		11	9		0.730454	0.454327		0.505699	0.367635
10	8		0.11	0.22	0.15	0.32	0.21	0.56	0.91	5.65		0.423776	0.509745		0.230077	0.296766		0.227966	0.484829		0.220073	0.696899		12	9		0.621288	0.388505		0.621288	0.266495
11	9		0.11	0.23	0.15	0.37	0.21	0.73	0.99	6.19		0.417707	0.517836		0.230077	0.295098		0.457537	0.69353		1.03701	0.67856		12	10		0.770589	0.378873		0.573126	0.3275
8	9		0.11	0.11	0.15	0.38	0.21	0.62	0.95	5.9		0.366126	0.530984		0.24008	0.253418		0.341949	0.757746		0.966989	0.683561		8	8		0.757746	0.367635		0.515332	0.276128
8	10		0.12	0.13	0.15	0.38	0.21	0.67	0.95	5.92		0.362081	0.537052		0.245082	0.215072		0.348371	0.65179		0.530177	0.683561		9	9		0.926312	0.349976		0.552256	0.240809
9	10		0.12	0.12	0.16	0.41	0.22	0.75	0.96	5.99		0.299374	0.548178		0.245082	0.236746		0.208701	0.716006		0.468489	0.881961		9	9		0.727244	0.454327		0.727244	0.231177
9	12		0.12	0.14	0.16	0.43	0.22	0.59	1.04	6.49		0.372195	0.561326		0.253418	0.475158		0.224755	0.666239		0.418473	0.631877		10	9		0.738481	0.346765		0.738481	0.26489
9	13		0.12	0.15	0.16	0.45	0.22	0.61	0.86	5.35		0.305442	0.569417		0.253418	0.355118		0.276128	0.585969		0.361787	0.715238		10	9		0.600417	0.260074		0.667844	0.221544
9	13		0.13	0.11	0.17	0.4	0.22	0.61	0.99	6.14		0.184074	0.576497		0.260087	0.361787		0.293787	0.699952		0.391797	0.783595		10	9		0.555466	0.256863		0.685503	0.290576
9	13		0.13	0.11	0.17	0.4	0.22	0.63	0.88	5.5		0.193177	0.598748		0.261754	0.216739		0.280944	0.754535		0.251751	0.816939		11	9		0.767378	0.237598		0.691925	0.157329
9	14		0.14	0.11	0.17	0.41	0.23	0.57	0.67	4.19		0.201268	0.608862		0.265088	0.233411		0.247231	0.444694		0.311771	0.728576		12	9		0.704768	0.231177		0.674266	0.284155
9	8		0.14	0.1	0.18	0.25	0.24	0.62	1.06	6.63		0.132493	0.62201		0.266756	0.286762		0.219939	0.593996		0.206736	0.686896		12	9		0.674266	0.309841		0.532991	0.215123
9	9		0.15	0.13	0.18	0.28	0.24	0.57	0.68	4.22		0.555258	0.627067		0.275092	0.305102		0.899021	0.58918		0.236746	0.796932		12	9		0.740087	0.253652		0.707979	0.117194
9	10		0.15	0.13	0.19	0.28	0.25	0.57	1.05	6.56		0.528961	0.635158		0.283428	0.291764		0.637341	0.608444					8	8					0.701557	0.186226
9	10		0.16	0.1	0.19	0.42	0.25	0.55	1.07	6.66		0.467266	0.637181		0.296766	0.256752		0.65179	0.518542					9	8					0.704768	0.47038
9	10		0.16	0.09	0.2	0.4	0.25	0.5	1	6.24		0.415685	0.643249		0.323441	0.228409		0.569915	0.57152					9	9					0.699952	0.203885
9	11		0.16	0.09	0.2	0.29	0.26	0.77	0.8	4.96		0.410628	0.644261		0.333444	0.933645		0.532991	0.611655					9	9					0.796275	0.802697
9	13		0.2	0.15	0.2	0.22	0.26		1.03	6.43		0.442992	0.661454		0.340113	0.661887		0.465564	0.532991					10	9						0.16375
10	13		0.27	0.15	0.2	0.26	0.26		1.01	6.32		0.323647	0.663477		0.415138	0.676892		0.3275	0.505699					10	9
10	14			0.13	0.21	0.28	0.29		0.81	5.02		0.214416	0.663477		0.446816	0.591864		0.290576	0.760957					11	9
10	14			0.13	0.21	0.23	0.29		0.76	4.74		0.511768	0.616953		0.526842	0.553518		0.282549	0.791459					11	9
10	8			0.14	0.21	0.24	0.3		0.79	4.94		0.546155	0.566383		0.613538	0.483494		0.277733	0.679082					11	9
11	8			0.13	0.22	0.31	0.3		1.06	6.59		0.41973	0.662466		0.703568	0.340113		0.463959	0.680687					12	9
8	9			0.12	0.23	0.22	0.3		1.06	6.6		0.38332	0.589645		1.03701	0.301767		0.359608	0.59239					8	8
8	10			0.16	0.23	0.23	0.31		0.99	6.15		0.449061	0.61493		1.07536	0.293431		0.329106	0.500883					9	8
9	10			0.11	0.23	0.26	0.34		0.84	5.22		0.330727	0.623021		1.05202	0.288429		0.269706	0.595601					9	9
9	11			0.1	0.24	0.28	0.34		0.93	5.82		0.298362	0.589645		0.941981	0.481827		0.240809	0.552256					9	9
9	11				0.25	0.3	0.34		1.06	6.6		0.281169	0.536041		0.975325	0.373458		0.133248	0.50891					10	9
9	11				0.26	0.27	0.36		0.71	4.43		0.147664	0.569417		0.198399	0.341781								10	9
9	12				0.28		0.37		0.79	4.9			0.593691		0.906969	0.280093								11	9
9	12				0.28		0.38		0.73	4.57			0.670557		0.645215	0.250083								12	9
10	8				0.29		0.45		0.93	5.82			0.619987		0.513505	0.138379								12	9
10	8				0.32		0.46		1.05	6.53			0.655386		0.491831	0.263421								12	10
8	8				0.36		0.49		0.65						0.296766	0.141714								9	8
9	9						0.5		0.65						0.415138	0.283428								10	9
9	10						0.53		0.68						0.218406	0.233411								10	9
9	10						0.55		0.68						0.253418	0.211737								10	9
9	10						0.65		0.69						0.18006	0.260087								11	9
9	11						0.67		0.7						1.03701	0.173391								11	9
9	11								0.71						0.266756	0.235078								11	9
10	12								0.75						0.703568	0.153384								12	9
10	8								0.91						0.613538	0.225075								13	10
11	9								0.92						0.333444	0.513505								13	10
8	10								0.93						0.228409	0.278426								8	8
8	10								0.98						0.340113	0.501834								9	9
9	10														0.275092	0.896966								9	9
9	11														0.163388	1.03534								9	9
9	11														0.191731	1.03201								10	9
9	11														0.225075	1.07536								10	9
9	11															0.9003								11	9
9	12															0.971991								11	10
9																0.608536								11	10
10																0.625208								12	10
																0.520173			0.520173						8
																0.833611			0.833611						8
																0.653551			0.653551						9
																0.448483			0.448483						9
																0.473491			0.473491						9
																0.421807			0.421807						9
																0.346782			0.346782						9
																0.255085			0.255085						9
																0.303434			0.303434						9
																0.291764			0.291764						9
																0.286762			0.286762
																0.278426			0.278426
																0.195065			0.195065
