# Supplementary material for: Aggregation pheromone 4-vinylanisole promotes the synchrony of sexual maturation in female locusts
Source: eLife. 2022 Mar 8;11:e74581. doi: 10.7554/eLife.74581 (PMC8903828; doi:10.7554/eLife.74581)
Supplement: Figure 2—figure supplement 2—source data 1. [file elife-74581-fig2-figsupp2-data1.xlsx]

## Sheet: Sheet1
Figure 2-S2
0 ng	1 ng	10 ng	100 ng	1000 ng	10000 ng
0.478329	0.25653	0.814652	1.0013	0.566034	1.06106
0.84028	0.423425	0.670123	0.578113	0.73598	1.041
0.249353	0.331106	0.46394	0.996677	0.624433	1.03554
0.891432	0.845643	0.983023	0.97588	1.05308	0.974725
0.946365	0.900905	0.970839	0.971469	0.976616	1.01296
0.944895	0.893908	0.945	1.01768	0.973464	0.96107
0.962856	0.920253	0.979872	0.742177	0.934181	0.877462
0.817172	0.771441	0.921052	0.81066	0.945945	1.01579
0.891012	0.866109	0.778309	0.76476	0.857716	0.893008
0.891432	0.537215	0.640504	0.987539	0.887861	0.812341
0.702999	1.06344	0.984913	0.922523	0.985333	0.670964
0.493034	1.02103	1.00098	1.01579	0.95876	0.775158
0.649642	0.980261	0.876517	0.932501	1.02609	0.76581
0.432429	0.826209	0.739657	0.897734	0.903616	0.779045
0.469401	1.01291	0.846687	0.807194	1.04814	0.639348
0.362686	0.492569	0.681257	0.962016	0.966007	0.854775
0.210385	0.249577	1.03176	0.831667	0.974515	0.96086
0.575592	0.673294	0.604056	0.987014	0.939643	0.998463
0.834608	1.02419	0.509	0.894898	1.06968	1.02598
0.989115	0.763475	0.439992	0.846582	0.96002	0.94626
0.710772	0.739241	0.411737	0.904351	0.778625	0.862863
0.749635	1.05689	0.400919	0.718019	0.84112	0.938593
0.823895	0.873376	0.363211	0.702369	1.01002	1.03848
0.577482	0.590702	0.255655	0.961911	0.931556	1.06463
0.497131	0.461583	0.58557	1.0139	0.613194	0.93061
0.562673	0.743554	0.637247	0.733775	0.990585	0.954978
0.622332	0.397703	0.505008	1.11274	0.559942	0.802362
0.517402	0.600368	0.393251	0.571285	0.974935	1.04562
0.39052	0.346494	0.784401	0.749635	0.88471	0.612354
0.294413	0.384464	0.427282	0.443773	0.686929	0.956554
0.263953	0.464267	0.431274	0.534208	0.695752	1.12513
0.279708	0.446048	0.295989	0.558366	1.13375	0.61414
0.706571		0.363211	0.802257	0.681047
0.275087				0.68966
0.324978				0.628319
0.299245
0.330125
