# Supplementary material for: Aggregation pheromone 4-vinylanisole promotes the synchrony of sexual maturation in female locusts
Source: eLife. 2022 Mar 8;11:e74581. doi: 10.7554/eLife.74581 (PMC8903828; doi:10.7554/eLife.74581)
Supplement: Figure 2—figure supplement 3—source data 1. [file elife-74581-fig2-figsupp3-data1.xlsx]

## Sheet: Sheet1
wt♀	Or35-/-♀
0.643763	0.878151
0.695136	0.754535
0.838016	0.629314
0.767378	0.59239
0.688714	0.542623
0.749719	0.4463
0.907048	0.462354
0.91668	0.377268
0.621288	0.46717
0.735271	0.419008
0.767378	0.375662
0.842832	0.476802
0.908653	0.288971
0.929523	0.189437
0.667844	0.287366
0.687109	0.227966
0.722427	0.240809
0.785038	0.252047
0.890994	0.258468
0.778616	0.234388
