# Supplementary material for: Aggregation pheromone 4-vinylanisole promotes the synchrony of sexual maturation in female locusts
Source: eLife. 2022 Mar 8;11:e74581. doi: 10.7554/eLife.74581 (PMC8903828; doi:10.7554/eLife.74581)
Supplement: Figure 2—source data 1. [file elife-74581-fig2-data1.xlsx]

## Sheet: Sheet1
FIG 2A																	FIG 2B									FIG 2C					FIG 2D							FIG 2E			FIG 2F			FIG 2G
	G-Male					G-Female					S-Male						4-VA, Anisole, Guaicol, PAN, Vertrole	,-,-,-,-,-	,+,+,+,+,+	,-,+,+,+,+;	,+,-,+,+,+;	,+,+,-,+,+;	,+,+,+,-,+;	,+,+,+,+,-;		4-VA, Anisole, Guaicol, PAN, Vertrole	,-,-,-,-,-	,+,+,+,+,+	,+,-,-,-,-;		0 ng	1 ng	10 ng	100 ng	1000 ng	10000 ng		wt♀	Or35-/-♀		wt♀	Or35-/-♀		WT♀(-)	WT♀(+)	OR35-/-♀(-)	OR35-/-♀(+)
	1 day	2 day	4 day	6 day	8 day	1day	2day	4day	6day	8day	1 day	2 day	4 day	6 day	8 day			0.683898	0.541018	0.950393	0.961631	0.569915	0.915075	0.79467			0.714882	1.02296	0.915075		0.478329	0.25653	0.814652	1.0013	0.566034	1.06106		8	8		0.696741	0.36603		0.221544	0.611655	0.462354	0.680687
4-vinylanisole	0.0358865	0.0808158	0.158091	0.25196	0.346304	0.0347074	0.09635	0.0919714	0.13168	0.172987	0.00101457	0.00130797	0.00292353	0.000968915	0.00043565			0.61005	0.677476	0.97929	0.789854	0.627709	0.879756	0.744903			0.858244	0.93755	0.948788		0.84028	0.423425	0.670123	0.578113	0.73598	1.041		9	8		0.690319	0.247231		0.293787	0.847648	0.292182	0.253652
PAN	0.0675823	0.00728359	0.07381	0.350737	0.0987648	0	0.08295	0.234243	0.1958	0.189775	0.026525	0.0272273	0.0235119	0.0402165	0			0.655001	0.645368	0.910258	0.541018	0.597207	0.921496	0.931129			0.700594	0.83641	0.829989		0.249353	0.331106	0.46394	0.996677	0.624433	1.03554		9	8		0.736876	0.351581		0.192647	0.764168	0.203885	0.269706
guaicol	0.0408643	0.134097	0.268334	0.425878	0.477225	0	0.6169	3.43484	0.861343	0.6367	0.128734	0.140519	0.210285	0.196939	0.103243			0.561888	0.460748	0.846043	0.505699	0.574731	0.709584	0.910258			0.852464	0.657409	0.738481		0.891432	0.845643	0.983023	0.97588	1.05308	0.974725		9	9		0.720822	0.269706		0.455932	0.661422	0.221544	0.147696
vertrole	0.0761259	0.0665815	0.210372	0.553025	0.412196	0.0806036	0.0880125	0.366771	0.302786	0.380475	0.00141095	0.00124686	0.0142267	0.00553457	0.000701362			0.398138	0.606839	0.632525	0.876545	0.473591	0.659817	0.884572			0.35126	0.724996	0.632525		0.946365	0.900905	0.970839	0.971469	0.976616	1.01296		9	9		0.730454	0.274522		0.231177	0.679082	0.18141	0.194253
Benzadehyde	0.658643	0.814913	1.0107	1.09227	0.759375	0	5.437	9.831	11.5581	8.8585	0.839187	0.601051	0.946655	1.00421	0.335333			0.515332	0.61005	0.897415	0.52978	0.496067	0.772195	0.749719			0.36603	0.809119	0.590785		0.944895	0.893908	0.945	1.01768	0.973464	0.96107		9	10		0.749719	0.574731		0.703163	0.865307	0.579547	0.569915
Benzenacetaldehyde	0.298692	0.0863598	0.483744	0.676091	0.0966624	0.0371875	0.810375	2.40136	1.7514	2.8488	0.417021	0.221887	0.517227	0.525756	0.31169			0.354792	0.759351	0.939156	0.55065	0.536202	0.582758	1.02264			0.377268	0.626104	0.852464		0.962856	0.920253	0.979872	0.742177	0.934181	0.877462		9	10		0.887783	0.593996		0.489645	0.717611	0.160539	0.240809
Anisole	0.134514	0.0980105	0.314444	0.593948	0.474249	0.0792239	0.459275	0.651186	0.334257	0.713975	0.0805157	0.0250446	0.018256	0.0166472	0.0370022			0.337133	0.926312	0.829989	0.65179	0.536202	0.645368	0.743297			0.405362	0.62209	0.797881		0.817172	0.771441	0.921052	0.81066	0.945945	1.01579		9	11		0.730454	0.369241		0.375662	0.738481	0.211912	0.263285
Pentanoic acid	0.154363	0	0.179975	0.175265	0.131494	0.010875	0.439163	0.978957	0.776425	0.358575	0.0787513	0.270894	0.0617351	0.0793305	0.375275			0.195858	0.751324	0.674266	0.669449	0.545834	0.573126	0.748114			0.781827	0.902392	0.934339		0.891012	0.866109	0.778309	0.76476	0.857716	0.893008		10	11		0.621288	0.293787		0.284155	0.725638	0.147696	0.28576
Hexanoic acid	0.398981	0	0.405451	0.278173	0.192627	0	0.540557	0.277017	0.458371	1.28069	0.0914867	0.229368	0.0745056	0.181393	0.36219			0.253652	0.775405	0.375662	0.781827	0.558677	0.468775	0.736876			0.850056	0.768663	0.972869		0.891432	0.537215	0.640504	0.987539	0.887861	0.812341		10	11		0.735271	0.221544		0.146091	0.626104	0.799486	0.210307
beta-Ionone	0.00384167	0.0159933	0.00870554	0.0114488	0.00291193	0	0.216762	0.369914	0.465562	0.434643	0	0	0	0.00180941	0.00404179			0.762562	0.87494	0.47038	0.656606	0.563493	0.531385	0.696741			0.885054	0.987317	0.699952		0.702999	1.06344	0.984913	0.922523	0.985333	0.670964		8	8		0.913469	0.359608		0.22315	0.690319	0.393322	0.401349
2,5-dimethyl-Pyrazine	0.139186	0.0175081	0.0884993	0.14593	0.179128	0.00152325	0.247237	0.219438	0.168275	0.186463	0.326351	0.0125631	0.0782568	0.23654	0.0174872			0.759351	0.704768	0.364424	0.663028	0.963236	0.492856	0.703163			0.560925	0.805908	0.552256		0.493034	1.02103	1.00098	1.01579	0.95876	0.775158		9	8		0.913469	0.258468		0.133248	0.829989	0.197463	0.200674
Phenol	0.0400829	0.472025	0.222245	0.34683	0.311621	0	0.683238	1.31208	1.05594	0.810987	0.210536	0.419326	0.490073	0.225874	0.116193			0.7738	0.744903	0.439878	0.870124	0.905442	0.557072	0.690319			0.489485	0.899663	0.600417		0.649642	0.980261	0.876517	0.932501	1.02609	0.76581		9	9		0.727244	0.59239		0.414192	0.634131	0.255258	0.378873
Phenylethyl alcohol	0.0173412	0.028373	0.147455	0.131967	0.037292	0	0.0241835	0.285662	0.345187	0.686387	0.0468387	0.0492144	0.0542682	0.114628	0.0714401			0.226361	0.809119	0.178199	0.611655	0.926312	0.58918	0.653395			0.561888	0.747793	0.695136		0.432429	0.826209	0.739657	0.897734	0.903616	0.779045		9	9		0.757746	0.256863		0.219939	0.663028	0.22315	0.231177
4-vinylveratrole	0.000692419	0.000824106	0.00216244	0.00236053	0.00195097	0	0.0125615	0.00951675	0.0244604	0.0203625	0	0.000265219	0	8.46e-05	0.00250623			0.443089	0.600417	0.377268	0.802697	0.838016	0.534596	0.555466			0.638144	0.724996	0.606839		0.469401	1.01291	0.846687	0.807194	1.04814	0.639348		9	9		0.733665	0.280944		1.013	0.772195	0.393322	0.221544
																		0.419008	0.730454	0.4463	0.608444	0.768984	0.549045	0.420613			0.495425	0.777492	0.481618		0.362686	0.492569	0.681257	0.962016	0.966007	0.854775		9	10		0.667844	0.210307		0.192647	0.740087	0.261679	0.512121
																		0.444694	0.569915	0.104351	0.536202	0.658212	0.545834	0.303419			0.632044	0.853428	0.85728		0.210385	0.249577	1.03176	0.831667	0.974515	0.96086		9	10		0.642158	0.245625		0.337133	0.638947	0.234388	0.131642
																		0.370846	0.775405	0.093113	0.613261	0.608444	0.825173	0.655001			0.503452	0.97335	0.688714		0.575592	0.673294	0.604056	0.987014	0.939643	0.998463		9	10		0.581153	0.313052		0.260074	0.624498	0.178199	0.208701
																		0.380478	0.741692	0.086691	0.626104	0.675871	0.52978	0.645368			0.334725	0.716006	0.706373		0.834608	1.02419	0.509	0.894898	1.06968	1.02598		9	11		0.603628	0.311446		0.195858	0.683898	0.258468	0.526569
																		0.393322	0.494461	0.091507	0.531385	0.565099	0.616471	0.685503			0.473752	0.942045	0.704768		0.989115	0.763475	0.439992	0.846582	0.96002	0.94626		10	11		0.626104	0.256863		0.149302	0.754535	0.144485	0.252047
																		0.269706	0.47038	0.213517	0.553861	0.643763	0.534596	0.520148			0.310483	1.09167	0.786643		0.710772	0.739241	0.411737	0.904351	0.778625	0.862863		8	8		0.635736	0.168566
																		0.290576	0.534596	0.587574	0.669449	0.547439	0.537807	0.980896			0.988441	0.632846	0.892599		0.749635	1.05689	0.400919	0.718019	0.84112	0.938593		8	9		0.728849	0.178199
																		0.372451	0.585969	0.555466	0.777011	0.581153	0.492856	0.553861			0.912506	0.578424	0.545834		0.823895	0.873376	0.363211	0.702369	1.01002	1.03848		9	9		0.740087	0.438273
																		0.709584	0.48804	0.402954	0.502488	0.502488	0.56831	0.638947			0.601541	0.752288	0.650185		0.577482	0.590702	0.255655	0.961911	0.931556	1.06463		9	9		0.659817	0.841227
																		0.691925	0.597207	0.203885	0.637341	0.547439	0.494461	0.616471			0.717772	0.426393	0.563493		0.497131	0.461583	0.58557	1.0139	0.613194	0.93061		9	10		0.71119	0.187831
																		0.528175		0.16375	0.73206	0.666239	0.553861	0.542623			0.807353	0.402954	0.496067		0.562673	0.743554	0.637247	0.733775	0.990585	0.954978		9	10
																		0.502488		0.253652	0.510515	0.494461	0.516937	0.655001			0.602665	0.588698	0.616471		0.622332	0.397703	0.505008	1.11274	0.559942	0.802362		9	10
																		0.478407		0.332317	0.558677	0.473591		0.669449			0.322042	0.844116	0.608444		0.517402	0.600368	0.393251	0.571285	0.974935	1.04562		10	10
																		0.40777		0.271312	0.430246	0.427035		0.608444			0.379676	1.07706	0.531385		0.39052	0.346494	0.784401	0.749635	0.88471	0.612354		10	11
																		0.353187		0.394927	0.524964	0.364424		0.863702			0.235351	0.75582	0.770589		0.294413	0.384464	0.427282	0.443773	0.686929	0.956554		10	12
																		0.436667		0.255258	0.454327			0.768984			0.170172	0.815059	0.55065		0.263953	0.464267	0.431274	0.534208	0.695752	1.12513		8	8
																		0.396532		0.301814	0.427035			0.624498			1.00177	0.544389	1.00498		0.279708	0.446048	0.295989	0.558366	1.13375	0.61414		9	8
																		0.401349		0.160539	0.47038			0.606839			0.626906	0.748274	0.616471		0.706571		0.363211	0.802257	0.681047			9	9
																		0.420613		0.28576	0.447905			0.576336			0.452882	0.836089	0.760957		0.275087				0.68966			9	9
																		0.401349		0.512121				0.549045			0.583721	0.611976	0.770589		0.324978				0.628319			9	9
																		0.295393		0.438273				0.566704			0.588859	0.569754	0.998555		0.299245							9	10
																		0.288971		0.329106				0.436667			0.831915	0.799807	0.887783		0.330125							9	10
																		0.351581		0.444694				0.69353			0.562048	0.724033	0.892599									10	11
																		0.157329		0.398138				0.483224			0.403436	0.756943	0.846043									10	12
																		0.219939		0.423824				0.532991			0.227003	0.773961	1.04351									11	12
																		0.219939		0.401349							0.158613	0.63092	1.02585									8	8
																		0.199069		0.340344							0.360732	0.789693	0.767378									8	9
																		0.963236		0.321079							0.195216	0.613903	0.777011									9	9
																		0.927918		0.24402							0.930647	0.362659	1.05474									9	9
																		1.01621		0.258468							0.73206	0.806229	0.889388									9	10
																				0.325895							0.409376	0.78568	0.852464									9	10
																				0.227966							0.632204	0.733986	0.659817									9	11
																				0.231177							0.421576	0.790175	0.699952									9	11
																				0.268101							0.293306	0.914754	0.532991									9	11
																				0.229571							0.246428	0.673142	0.622893									11	12
																				0.123615							0.292663	0.710547	0.777011									8	8
																											0.264569	0.72323	0.789854									9	8
																											0.302938	0.606036	0.704768									9	9
																											0.160218	0.729331	0.634131									9	9
																											0.646492	0.925831	0.574731									9	10
																											0.633489	0.784074	0.717611									9	10
																											0.539734	0.724835										9	11
																											0.607											9	11
																											0.369401											9	11
																											0.597528											10	12
																											0.387382
																											0.321882
																											0.202119
																											0.19634
																											0.204848
