# Supplementary material for: Aggregation pheromone 4-vinylanisole promotes the synchrony of sexual maturation in female locusts
Source: eLife. 2022 Mar 8;11:e74581. doi: 10.7554/eLife.74581 (PMC8903828; doi:10.7554/eLife.74581)
Supplement: Figure 3—figure supplement 1—source data 1. [file elife-74581-fig3-figsupp1-data1.xlsx]

## Sheet: Sheet1
Control	5-th	1-2 days	3-4 days	5-6 days
0.569915	0.323166	0.180607	0.831273	0.482742
0.508428	0.158452	0.727244	0.634612	0.471504
0.545834	0.382565	0.193129	0.37807	0.494301
0.468133	0.208701	0.200193	0.680366	0.754054
0.331674	0.352866	0.25895	0.395087	0.731578
0.429443	0.746348	0.283994	0.52689	0.500562
0.295553	0.813293	0.292342	0.4166	0.304062
0.280944	0.148981	0.331032	0.659978	0.804784
0.163108	0.295874	0.830952	0.638786	0.6725
0.21127	0.4166	0.381923	0.562209	0.516616
0.635415	0.32156	0.413871	0.685343	0.527211
0.632686	0.33023	0.46717	0.607963	0.838176
0.644726	0.35704	0.480655	0.41965	0.754375
0.188634	0.343073	0.480655	0.643442	0.475357
0.258629	0.217049	0.515492	0.666239	0.720501
0.760315	0.65179	0.541499	0.532509	0.694172
0.501204	0.289774	0.701557	0.612939	0.637341
0.309038	0.504575	0.573928	0.801573	0.545031
0.317065	0.285118	0.598009	0.408573	0.583721
0.442768	0.433617	0.600417	0.589661	0.468133
0.292663	0.338738	0.619201	0.513405	0.561246
0.305025	0.411141	0.237277	0.751646	0.718253
0.337775	0.447905	0.247391	0.773479	0.654519
0.651469	0.414673	0.256863	0.678921	0.630117
0.7083	0.197945	0.140793	0.291861	0.541018
0.20228	0.141435	0.634933	0.419008	0.651148
0.46733	0.246107	0.242093	0.662065	0.421416
0.40777	0.370846	0.234066	0.717932	0.515332
0.339701	0.50891	0.385616	0.499278	0.758549
0.294269	0.574892	0.287847	0.707979	0.516616
0.363782	0.69931	0.302296	0.454166	0.527211
0.33039	0.211109	0.602504	0.541499	0.838176
0.334404	0.566223	0.555145	0.455611	0.754375
0.350458	0.451758	0.449992	0.438273	0.475357
0.334404	0.451758	0.579547	0.63381	0.720501
0.246107	0.629314	0.397817	0.830149	0.694172
0.240809	0.683898	0.161984	0.575694	0.637341
0.292984	0.164874	0.230214	0.676995	0.545031
0.131	0.424306	0.153636	0.606518	0.583721
0.183175	0.409376	0.188313		0.772676
0.237919	0.271954	0.486595		0.789693
0.592069	0.305346	0.782951		0.418366
0.44036	0.270991			0.650666
0.38401	0.462835			0.567186
0.419971	0.214481			0.801252
0.423021	0.832718			0.783432
0.331032				0.740889
0.25301				0.638465
0.292824				0.503773
0.368277
0.356237
0.629796
0.586611
0.378231
0.810724
0.747472
0.57152
0.858886
0.742013
