# Supplementary material for: Aggregation pheromone 4-vinylanisole promotes the synchrony of sexual maturation in female locusts
Source: eLife. 2022 Mar 8;11:e74581. doi: 10.7554/eLife.74581 (PMC8903828; doi:10.7554/eLife.74581)
Supplement: Figure 3—figure supplement 3—source data 1. [file elife-74581-fig3-figsupp3-data1.xlsx]

## Sheet: Sheet1
Figure 3-S3B											Figure 3-S3C
	control	0.1ng	1ng	10ng	100ng	1000ng	10000ng	100000ng	1000000ng			control	PAE 2d	PAE 4d	PAE 6d
	0	4	12	9	5	4	2	14	31			3	34	52	31
	0	4	5	1	1	0	0	17	23			0	62	61	23
	0	14	4	0	0	12	80	80	39			9	35		39
	0	9	16	17	15	10	21	91	34			0	44	22	34
	1	0	0	3	0	15	47	26	15			0	61	25	15
	11	0	0	0	8	0	5	34	21			0	65	32	21
	2	0	4	5	0	0	40	96	68			0	70	16	68
	3	20	4	0	9	13	41	107	108			0	22	40	108
	5	0	13	0	6	10	19	2	59			0	50	14	59
	2	11	4	8	9	0	0	38	40			0	52	36	40
	0	12	0	14	0	10	7	24	43			0	51	36	43
	0	10	0	15	13	7	15	8	17			0	73	31	17
	0	0	0	19	38	3	9	33	37			0	58	26	37
	0	0	0	0	1	0	17	22	67			0	10	34	67
	0	3	0	20	0	0	21	40	20			10	58	28	20
	4	16	16	2	0	4	6	15	28			5	25	24	28
	0	1	0	0	0	21	27	20	50			8	31	22	50
	12	4	0	12	10	35	12	32	22			0	51	22	22
	8	7	0	7	0	31	29	31	31			0	48	24	31
	0	4	17	5	6	0	37	38	65			0	22	88	65
	9	1	0	6	11	4	11	15	32			4	68	15	32
	10	5	17	0	0	13	14	44	62			8	38	34	62
	0	5	0	0	6	23	3	16	40			3	31	45	40
	11	8	0	0	0	11	33	68	37			3	53	33	37
	0	9	11	5	0	2	25	38	0			0	24	58
	0	0	0	0	1	7	14	22	40			1	21	20	40
	4	0	5	13	3	32	1	47	22			0	46	42	22
	13	0	8	0	15	2	7	19	30			3	40	61	30
	13	0	12	0	0	0	2	9	24			7	50	55	24
	0	0	14	15	14	28	11	16	36			5	37	31	36
	0	0	11	11	0	23	38	48	23			3	68	71	23
