# Supplementary material for: Aggregation pheromone 4-vinylanisole promotes the synchrony of sexual maturation in female locusts
Source: eLife. 2022 Mar 8;11:e74581. doi: 10.7554/eLife.74581 (PMC8903828; doi:10.7554/eLife.74581)
Supplement: Figure 3—figure supplement 4—source data 1. [file elife-74581-fig3-figsupp4-data1.xlsx]

## Sheet: Sheet1
1day	0.00056479
1day	0.00051256
1day	0.0010394
1day	0.0013036
1day	0.00036749
1day	0.00078956
2day	0.00058201
2day	0.00093678
2day	0.001543
2day	0.00080801
4day	0.0019531
4day	0.00095426
4day	0.0014974
4day	0.0015975
4day	0.0008883
6day	0.0014166
6day	0.0010662
6day	0.0010299
6day	0.0013433
8day	0.0011587
8day	0.0012533
8day	0.00059424
8day	0.0012304
8day	0.0011038
