# Supplementary material for: Aggregation pheromone 4-vinylanisole promotes the synchrony of sexual maturation in female locusts
Source: eLife. 2022 Mar 8;11:e74581. doi: 10.7554/eLife.74581 (PMC8903828; doi:10.7554/eLife.74581)
Supplement: Figure 3—figure supplement 6—source data 1. [file elife-74581-fig3-figsupp6-data1.xlsx]

## Sheet: Sheet1
Figure 3-S6A			Figure 3-S6B
Control	4-VA		Control	4-VA
0.343886	0.739694		1.69349	0.972655
0.286181	0.486328		1.20581	0.712025
0.353553	0.332171		1.99308	1.05336
0.306721	0.624165		2.02792	0.989657
