# Supplementary material for: Aggregation pheromone 4-vinylanisole promotes the synchrony of sexual maturation in female locusts
Source: eLife. 2022 Mar 8;11:e74581. doi: 10.7554/eLife.74581 (PMC8903828; doi:10.7554/eLife.74581)
Supplement: Figure 3—source data 1. [file elife-74581-fig3-data1.xlsx]

## Sheet: Sheet1
FIG 3A					FIG 3E							FIG 3F							FIG 3G							FIG 3H
Control	4-VA1-2	4-VA3-4	4-VA5-6		1-2 day		3-4 day		5-6 day			1-2 day		3-4 day		5-6 day			1-2 day		3-4 day		5-6 day			1-2 day		3-4 day		5-6 day
0.218494	0.749398	0.369562	0.94349		Control	4-VA	Control	4-VA	Control	4-VA		Control	4-VA	Control	4-VA	Control	4-VA		Control	4-VA	Control	4-VA	Control	4-VA		Control	4-VA	Control	4-VA	Control	4-VA
0.178841	0.619361	0.889549	0.794349		0.722	0.752	0.78	1.23	6.70686	10.5124		0.0363	0.2124	6.2985	632.534	278.204	265.028		1.28344	1.47387	0.591181	0.963375	1.2823	0.8548		0.718152	0.73473	0.534714	0.959609	1.10771	1.47539
0.174506	0.621609	0.605876	0.762402		0.848	0.841	0.81	1.26	3.91861	0.508666		0.0567	1.1057	203.657	613.109	374.806	592.224		1.003	1.16198	0.411404	0.613979	1.5546	1.347		0.442009	0.517827	0.843137	1.00547	0.946509	1.04814
0.234066	0.751646	0.552416	0.826457		0.851	0.85	0.825	1.33	1.10023	0.455916		0.3499	0.0142	85.9246	246.424	519.147	680.287		0.637927	0.758142	0.437681	0.939315	1.1302	0.7756		0.818939	0.866339	0.670924	1.29273	1.19677	1.59026
0.255579	0.587895	0.540376	0.743619		1.07	0.89	0.826	1.52	1.49962	1.34891		0.0544	0.05347	25.8125	427.401	619.517	400.617		0.881848	0.665267	0.598045	1.21359	0.7463	0.7798		0.631841	0.562056	0.998439	1.63236	1.45634	1.74564
0.218013	0.62193	0.650506	0.642639		1.21	1.14	0.903	1.64	1.50339	5.9156																1.07743	1.06667	0.705251	1.68574	1.99277	1.83125
0.154439	0.619522	0.554503	0.953444		1.31	1.22	1.02	1.68258	3.24039	0.685757
0.162466	0.576176	0.543747	0.92567		1.37	1.37	1.15	1.74	4.63451	0.681989
0.201156	0.593675	0.419489	0.79772		1.51	1.44	1.31	2.07	2.51696	1.85381
0.254937	0.762723	0.5834	0.822122		1.51	1.46	1.34	2.11	1.25848	3.99397
0.161503	0.727083	0.577621	0.726601		1.76	1.79	1.61	2.21	3.67747	0.422005
0.182052	0.255097	0.435062	0.898218
0.116712	0.299567	0.442607	0.646011
0.149623	0.38385	0.38995	0.821801
0.186707	0.373896	0.380639	0.668968		Figure 3B
0.104672	0.241451	0.384492	0.504094			PAE 2d												PAE 4d										PAE 6d
0.19634	0.255418	0.411463	0.668647		0.1	0.119	0	0.484	0	0.156	0.756	0.096	0.258	0.112	0.642	0		0.073	0.309	0.852	0.368	0.174	0.464	0.617	0.308	0.853		0.354	0.639	0.349	0.581	0.578	0.445	0
0.190239	0.24402	0.330872	0.537004		1	0	0	0.523	0.504	0.136	0.697	0.194	0.329	0.184	0.791	0.122		0.209	0.29	0.949	0.407	0.039	0.639	0.84	0.647	1.08		0.396	1.007	0.613	0.717	0.742	0.512	0
0.132766	0.308557	0.34821	0.451276		10	0.033	0	0.542	0.504	0.175	0.678	0.252	0.273	0.152	0.407	0.049		0.173	0.348	0.658	0.484	0.193	0.464	0.768	0.412	1.047		0.299	0.775	0.29	0.543	0.69	0.457	0
0.157008	0.219778	0.397817	0.4227		100	0.149	0	0.542	0.504	0.194	0.639	0.62	0.39	0.291	0.768	0.251		0.346	0.484	0.931	0.329	0.251	0.658	0.563	0.334	1.215		0.246	1.026	0.442	0.677	0.843	0.808	0.005
0.158773	0.269064	0.320116	0.178038		1000	0.4	0	0.736	0.794	0.291	0.91	0.697	0.602	0.423	1.432	0.335		0.418	0.601	1.395	0.542	0.368	0.89	0.865	0.468	1.448		0.45	1.568	0.723	0.91	1.045	0.957	0.079
0.115909	0.197463	0.349013	0.206935		10000	1.261	0.121	1.472	2.139	0.93	1.946	1.685	1.508	1.2	3.395	0.949		1.41	1.549	2.722	1.278	0.929	2.042	2.229	1.766	3.93		1.429	3.378	1.675	1.858	2.468	1.888	0.66
0.175951	0.271312	0.337935	0.231979
0.154439	0.264248	0.299406	0.177236
0.117675	0.266174	0.367956	0.247391
0.63381	0.25879	0.260716	0.141275
0.558196	0.23824	0.352223	0.112538
0.816985	0.265532	0.295393	0.157971
0.682774	0.171135	0.349013	0.144004
0.529298	0.253813	0.257666	0.144967
0.671055	0.79756	0.322203	0.178359
0.481779	0.830952	0.284315	0.23519
0.864023	0.662546	0.207096	0.136137
0.619522	0.649061	0.245304	0.170493
0.528014	0.5773	0.242896	0.140151
0.631562	0.615829	0.288489	0.120244
0.488843	0.575213	0.240328	0.110451
0.543908	0.494943	0.738802	0.218494
0.574249	0.581795	0.575052	0.107882
0.531064	0.171296	0.752288	0.103387
0.452721	0.157008	0.656285	0.147857
0.489645	0.491411	0.736555	0.127629
0.305988	0.525767	0.659335	0.147375
0.413389	0.406807	0.615829	0.117996
0.53861	0.456414	0.466367	0.137743
0.403114	0.391716	0.59528	0.109167
0.402312	0.393161	0.550971	0.142559
0.389308	0.443731	0.657891	0.147054
0.423664	0.374217	0.66078	0.123294
0.400546	0.304222	0.634773	0.21721
0.36619	0.27982	0.719377	0.153797
0.253331	0.313694	0.417563	0.202761
0.248194	0.35126	0.410981	0.173864
0.226361	0.284155	0.432654	0.615348
0.232782	0.336812	0.518382	0.569594
0.242896	0.282549	0.715524	0.562851
0.271954	0.238883	0.554985	0.509231
0.237919	0.284636	0.469096	0.265853
0.246107	0.248836	0.524643	0.437952
0.288971	0.260074	0.413068	0.275967
0.272114	0.268422	0.438915	0.289934
0.235511	0.327821	0.630599	0.43458
0.296035	0.257345	0.393	0.256221
0.276609	0.245786	0.55354	0.400546
0.350939	0.266495	0.476642	0.331514
0.347086	0.233745	0.582116	0.227324
0.263445	0.269706	0.368759	0.286563
0.230856	0.2201	0.444534	0.247552
0.251405	0.245946	0.475036	0.211751
0.213999	0.126345	0.262161	0.290255
0.192487	0.246267	0.253171	0.339059
0.229732	0.255418	0.270509	0.213838
0.213517	0.218494	0.353829	0.218494
0.576497	0.237919
0.399101	0.199872
0.873655	0.227324
0.083159	0.188473
0.10114	0.241291
0.86595	0.145609
0.163429	0.152191
1.02167	0.137582
0.116231	0.220902
0.975598	0.155884
0.125542	0.216407
0.943972	0.197945
0.150104	0.197303
0.242896	0.193771
0.401509	0.109969
0.123134	0.138706
0.659335	0.138224
0.353989
0.353989
0.207899
0.545673
0.578584
0.707337
0.864344
0.436346
0.230856
