# Supplementary material for: Aggregation pheromone 4-vinylanisole promotes the synchrony of sexual maturation in female locusts
Source: eLife. 2022 Mar 8;11:e74581. doi: 10.7554/eLife.74581 (PMC8903828; doi:10.7554/eLife.74581)
Supplement: Figure 4—figure supplement 1—source data 1. [file elife-74581-fig4-figsupp1-data1.xlsx]

## Sheet: Sheet1
Figure 4-S1A					Figure 4-S1B
wt♀(-)	wt♀(+)	or35-/-♀(-)	or35-/-♀(+)		4-VA,Methoprene (-,-)	4-VA,Methoprene (+,-)	4-VA,Methoprene (+,+)
0.226126	0.922122	0.757245	0.32275		0.817805	1.10603	1.60641
0.215453	0.15138	0.115311	0.164234		1.6194	1.42607	2.92996
0.0939283	0.496873	0.226812	0.250148		1.44346	1.7774	2.03767
0.271002	1.45977	0.221053	0.403839
