# Supplementary material for: Aggregation pheromone 4-vinylanisole promotes the synchrony of sexual maturation in female locusts
Source: eLife. 2022 Mar 8;11:e74581. doi: 10.7554/eLife.74581 (PMC8903828; doi:10.7554/eLife.74581)
Supplement: Figure 4—source data 1. [file elife-74581-fig4-data1.xlsx]

## Sheet: Sheet1
Fig 4A					Fig 4B					Fig 4C					Fig 4D				Fig 4E				Fig 4F
wt♀(-)	wt♀(+)	Or35-/-♀(-)	Or35-/-♀(+)		wt♀(-)	wt♀(+)	Or35-/-♀(-)	Or35-/-♀(+)		wt♀(-)	wt♀(+)	Or35-/-♀(-)	Or35-/-♀(+)		4-VA,Methoprene (-,-)	4-VA,Methoprene (+,-)	4-VA,Methoprene (+,+)		4-VA,Methoprene (-,-)	4-VA,Methoprene (+,-)	4-VA,Methoprene (+,+)		4-VA,Methoprene (-,-)	4-VA,Methoprene (+,-)	4-VA,Methoprene (+,+)
1.3	2.84	1.69	2.4		4544.8	38967.9	16158.4	4182.06		0.515682	1.50064	0.651019	0.544745		0.332477	0.600385	0.55477		1128.35	4688.79	7486.11		0.214907	0.343278	5.93526
1.49	4.59	2.57	0.948		2134.97	29125.6	1910.85	10155.7		0.953856	1.89276	0.535252	0.846367		0.225827	0.343559	0.586572		2574.36	4196.59	7082.29		0.214683	0.259368	3.99405
1.49	2.72	4.87	1.6		16498	75804.7	6936.54	2368.9		0.567376	1.62919	1.1796	0.467157		0.34372	0.227594	0.779955		1346.5	5693.1	12503.1		1.4891	1.21252	1.79619
1.43	5.34	0.463	2		9475.59	26801	1389.16	5752.61		0.654782	1.71043	0.874211	0.600379		0.23707	0.243495	0.554288		1327.96	3861.65	10050.6
2.1	6.32	3.65	1.56		4608.24	38166	4640.29	4153.18							0.489399	0.249277	0.652747		4990.61	1243.34	6912.54
					11346.8	41189.8	14066.7	25180.2							0.376646	0.456312	0.911661		2062.24	2674.4	7804.01
															0.469965	0.237873	0.905397
															0.460328	0.678285	0.902506
															0.481208	0.551397	0.95583
															0.24992	0.358497	0.913106
															0.308063	0.45053	0.766463
															0.82557	0.258272	0.645679
															0.258914	0.478959	1.03517
															0.36187	0.357533	0.829746
															0.474623	0.918728	0.837938
															0.475104	0.229682	0.541921
															0.231609	0.656762	0.714263
															0.676197	0.253614	0.693222
															0.190491	0.189207	0.535336
															0.34902	0.507067	0.57822
								Figure 4G								Figure 4H							Figure 4I
								4-va	PI+4-va	pi+jh+4-VA					4-VA	4-VA+PI	4-VA+PI+JH					4-VA	4-VA+PI	4-VA+PI+JH
								0.758832	0.885354	0.48204					53.4456	2.07053	20.2521					0.918667	0.199604	0.690153
								0.898632	0.178144	0.918935					101.829	1.95884	63.1189					0.521481	0.226896	0.649696
								0.402725	0.192632	0.549971					32.4467	4.40762	113.772					0.792734	0.361073	0.70925
								0.499496	0.202392	0.876644					48.1679	14.3204	114.563
								0.627035	0.152102	0.432671					102.537	39.3966	91.7731
								0.691894	0.199675	0.464128					89.2636	33.3589	72.5046
								0.84708	0.18148	0.752894
								0.5512	0.206473	0.281937
								0.87829	0.233036	0.818446
								0.959881	0.209972	0.899539
								0.807109	0.173188	0.89446
								0.870169	0.147468	0.630737
								0.478529	0.200469	0.59676
								0.382469	0.162473	0.915019
								0.581543	0.662534	0.497318
								0.381184	0.351057	0.696245
								0.210327	0.320248	0.433682
								0.4411	0.331613	0.672586
								0.553268	0.202791	0.413349
								0.559076	0.432692	0.235537
								0.662465	0.297758
								0.892575
								0.753195
								0.77077
								0.57095
								0.422756
