# Supplementary material for: Aggregation pheromone 4-vinylanisole promotes the synchrony of sexual maturation in female locusts
Source: eLife. 2022 Mar 8;11:e74581. doi: 10.7554/eLife.74581 (PMC8903828; doi:10.7554/eLife.74581)
Supplement: Supplementary file 1. [file elife-74581-supp1.xlsx]

## Sheet: Sheet1
GeneID	CK_CC-CA1	CK_CC-CA2	CK_CC-CA3	4V_CC-CA1	4V_CC-CA2	4V_CC-CA3	logFC(4V_CC-CA/CK_CC-CA)	logCPM(4V_CC-CA/CK_CC-CA)	CK_CC-CA_VS_4V_CC-CA(p-value)	CK_CC-CA_VS_4V_CC-CA(FDR)	FunctionDescription	Symbol	NR	Swissprot	Temble	COG	GO	IPR	KEGG
LOCMI16608	24.1995	37.3854	32.5411	12.5773	13.2594	13.5105	-1.97606	6.44261	4.52132e-05	0.00364675	EF-hand domain containing protein	EFH	EF-hand domain containing protein [Coptotermes formosanus]	NA	Uncharacterized protein OS=Strigamia maritima PE=4 SV=1	NA	GO:0005509; calcium ion binding; Molecular Function	IPR011992; EF-hand domain pair	NA
LOCMI16371	104.627	153.547	106.749	70.0948	70.9672	84.5475	-0.694004	6.02361	0.000112333	0.0052358	Acetyl-CoA acetyltransferase, cytosolic	ACAT2	GL16175 [Drosophila persimilis] gb|EDW33061.1| GL16175 [Drosophila persimilis]	Acetyl-CoA acetyltransferase, cytosolic OS=Homo sapiens GN=ACAT2 PE=1 SV=2	GL16175 OS=Drosophila persimilis GN=Dper\GL16175 PE=3 SV=1	COG0183|Acetyl-CoA acetyltransferase|I|Lipid transport and metabolism ;	GO:0003824; catalytic activity; Molecular Function GO:0008152; metabolic process; Biological Process GO:0016747; transferase activity, transferring acyl groups other than amino-acyl groups; Molecular Function	IPR002155; Thiolase IPR016038; Thiolase-like, subgroup IPR016039; Thiolase-like IPR020610; Thiolase, active site IPR020613; Thiolase, conserved site IPR020615; Thiolase, acyl-enzyme intermediate active site IPR020616; Thiolase, N-terminal IPR020617; Thiolase, C-terminal	K00626 E2.3.1.9, atoB; acetyl-CoA C-acetyltransferase [EC:2.3.1.9] [EC:2.3.1.9] Metabolism; Overview; Carbon metabolism [PATH:ko01200] Metabolism; Overview; Fatty acid metabolism [PATH:ko01212] Metabolism; Carbohydrate metabolism; Pyruvate metabolism [PATH:ko00620] Metabolism; Carbohydrate metabolism; Glyoxylate and dicarboxylate metabolism [PATH:ko00630] Metabolism; Carbohydrate metabolism; Prop…
LOCMI03890	6.24758	5.83269	4.12336	19.7088	14.5937	12.0173	2.15884	1.498	0.00162611	0.0671891	Diphosphomevalonate decarboxylase	mvd	PREDICTED: diphosphomevalonate decarboxylase-like isoform X1 [Apis mellifera]	Diphosphomevalonate decarboxylase OS=Danio rerio GN=mvd PE=2 SV=1	Uncharacterized protein OS=Apis mellifera GN=LOC725817 PE=4 SV=1	COG3407|Mevalonate pyrophosphate decarboxylase|I|Lipid transport and metabolism ;	GO:0004163; diphosphomevalonate decarboxylase activity; Molecular Function GO:0005524; ATP binding; Molecular Function GO:0008299; isoprenoid biosynthetic process; Biological Process	IPR005935; Diphosphomevalonate decarboxylase IPR006204; GHMP kinase N-terminal domain IPR014721; Ribosomal protein S5 domain 2-type fold, subgroup IPR020568; Ribosomal protein S5 domain 2-type fold	K01597 MVD, mvaD; diphosphomevalonate decarboxylase [EC:4.1.1.33] [EC:4.1.1.33] Metabolism; Metabolism of terpenoids and polyketides; Prenyltransferases [BR:ko01006] Metabolism; Metabolism of terpenoids and polyketides; Terpenoid backbone biosynthesis [PATH:ko00900]
LOCMI15621	3.796	2.17847	4.58152	0.809069	0.833927	1.70659	-1.63527	0.563815	0.0027689	0.105218	carboxylesterase	Ces4A	carboxylesterase [Locusta migratoria]	Esterase FE4 OS=Myzus persicae PE=1 SV=1	Carboxylesterase A4 OS=Locusta migratoria GN=CesA4 PE=2 SV=1	COG2272|Carboxylesterase type B|I|Lipid transport and metabolism ;	NA	IPR002018; Carboxylesterase, type B IPR019819; Carboxylesterase type B, conserved site IPR019826; Carboxylesterase type B, active site	NA
LOCMI16436	585.216	487.978	467.315	1733.24	1658.97	1751.61	1.47677	7.71364	0.000307456	0.0104221	Isopentenyl-diphosphate Delta-isomerase 1	Idi1	Isopentenyl-diphosphate Delta-isomerase 1 [Zootermopsis nevadensis]	Isopentenyl-diphosphate Delta-isomerase 1 OS=Mus musculus GN=Idi1 PE=2 SV=1	Isopentenyl-diphosphate delta isomerase OS=Anopheles darlingi GN=AND_005546 PE=4 SV=1	COG1443|Isopentenyldiphosphate isomerase|I|Lipid transport and metabolism ;	GO:0004452; isopentenyl-diphosphate delta-isomerase activity; Molecular Function GO:0008299; isoprenoid biosynthetic process; Biological Process GO:0016787; hydrolase activity; Molecular Function	IPR000086; NUDIX hydrolase domain IPR011876; Isopentenyl-diphosphate delta-isomerase, type 1 IPR015797; NUDIX hydrolase domain-like	K01823 idi, IDI; isopentenyl-diphosphate delta-isomerase [EC:5.3.3.2] [EC:5.3.3.2] Metabolism; Metabolism of terpenoids and polyketides; Prenyltransferases [BR:ko01006] Metabolism; Metabolism of terpenoids and polyketides; Terpenoid backbone biosynthesis [PATH:ko00900]
LOCMI16309	129.38	103.723	113.438	243.647	228.579	233.47	1.54489	5.56964	0.00570675	0.0152096	3-hydroxy-3-methylglutaryl-coenzyme A reductase	HMGCR	3-hydroxy-3-methylglutaryl-coenzyme A reductase [Zootermopsis nevadensis]	3-hydroxy-3-methylglutaryl-coenzyme A reductase OS=Blattella germanica PE=2 SV=1	3-hydroxy-3-methylglutaryl coenzyme A reductase OS=Nasutitermes takasagoensis GN=HMGR PE=2 SV=1	COG1257|Hydroxymethylglutaryl-CoA reductase|I|Lipid transport and metabolism ;	GO:0004420; hydroxymethylglutaryl-CoA reductase (NADPH) activity; Molecular Function GO:0005789; endoplasmic reticulum membrane; Cellular Component GO:0008299; isoprenoid biosynthetic process; Biological Process GO:0015936; coenzyme A metabolic process; Biological Process GO:0016021; integral component of membrane; Cellular Component GO:0016616; oxidoreductase activity, acting on the CH-OH group …	IPR000731; Sterol-sensing domain IPR002202; Hydroxymethylglutaryl-CoA reductase, class I/II IPR004554; Hydroxymethylglutaryl-CoA reductase, eukaryotic/arcaheal type IPR004816; Hydroxymethylglutaryl-CoA reductase, metazoan IPR009023; Hydroxymethylglutaryl-CoA reductase, class I/II, NAD/NADP-binding IPR009029; Hydroxymethylglutaryl-CoA reductase, class I/II, substrate-binding IPR023074; Hydroxymeth…	K00021 HMGCR; hydroxymethylglutaryl-CoA reductase (NADPH) [EC:1.1.1.34] [EC:1.1.1.34] Metabolism; Metabolism of terpenoids and polyketides; Prenyltransferases [BR:ko01006] Metabolism; Metabolism of terpenoids and polyketides; Terpenoid backbone biosynthesis [PATH:ko00900] Organismal Systems; Digestive system; Bile secretion [PATH:ko04976]
LOCMI05712	27.6791	28.1796	29.1384	52.1482	59.6115	61.9275	0.541222	3.48329	0.000683682	0.0170604	Diphosphomevalonate decarboxylase	Mvd	PREDICTED: diphosphomevalonate decarboxylase-like isoform X1 [Apis mellifera]	Diphosphomevalonate decarboxylase OS=Mus musculus GN=Mvd PE=1 SV=2	Uncharacterized protein OS=Apis mellifera GN=LOC725817 PE=4 SV=1	COG3407|Mevalonate pyrophosphate decarboxylase|I|Lipid transport and metabolism ;	GO:0004163; diphosphomevalonate decarboxylase activity; Molecular Function GO:0005524; ATP binding; Molecular Function GO:0008299; isoprenoid biosynthetic process; Biological Process	IPR005935; Diphosphomevalonate decarboxylase IPR006204; GHMP kinase N-terminal domain IPR014721; Ribosomal protein S5 domain 2-type fold, subgroup IPR020568; Ribosomal protein S5 domain 2-type fold	K01597 MVD, mvaD; diphosphomevalonate decarboxylase [EC:4.1.1.33] [EC:4.1.1.33] Metabolism; Metabolism of terpenoids and polyketides; Prenyltransferases [BR:ko01006] Metabolism; Metabolism of terpenoids and polyketides; Terpenoid backbone biosynthesis [PATH:ko00900]
LOCMI15554	62.0013	76.4719	80.7263	18.9794	25.9423	20.5765	-1.90726	4.33687	0.000703691	0.0173797	putative juvenile hormone esterase	Jhe	putative juvenile hormone esterase [Romalea microptera]	Esterase FE4 OS=Myzus persicae PE=1 SV=1	Putative juvenile hormone esterase (Fragment) OS=Romalea microptera PE=2 SV=1	COG2272|Carboxylesterase type B|I|Lipid transport and metabolism ;	NA	IPR002018; Carboxylesterase, type B IPR019826; Carboxylesterase type B, active site	NA
LOCMI17136	503.286	480.669	447.431	204.93	218.67	205.667	-1.08588	7.59425	0.00101039	0.0221938	Juvenile hormone epoxide hydrolase 1	EH1	Juvenile hormone epoxide hydrolase 1 [Zootermopsis nevadensis]	Juvenile hormone epoxide hydrolase 1 OS=Ctenocephalides felis GN=EH1 PE=1 SV=3	Juvenile hormone epoxide hydrolase-like protein 4 OS=Tribolium castaneum GN=Tcjheh-r4 PE=2 SV=1	COG0596|Predicted hydrolases or acyltransferases (alpha/beta hydrolase superfamily) |R|General function prediction only ;	GO:0003824; catalytic activity; Molecular Function GO:0033961; cis-stilbene-oxide hydrolase activity; Molecular Function	IPR000073; Alpha/beta hydrolase fold-1 IPR000639; Epoxide hydrolase-like IPR010497; Epoxide hydrolase, N-terminal IPR016292; Epoxide hydrolase	K01253 EPHX1; microsomal epoxide hydrolase [EC:3.3.2.9] [EC:3.3.2.9] Metabolism; Xenobiotics biodegradation and metabolism; Metabolism of xenobiotics by cytochrome P450 [PATH:ko00980] Organismal Systems; Digestive system; Bile secretion [PATH:ko04976] Human Diseases; Cancers; Chemical carcinogenesis [PATH:ko05204]
LOCMI07473	2150.83	2160.27	1680.04	2904.41	2229.09	2528.11	0.354793	9.26216	0.0327429	0.453672	Mevalonate kinase	MVK	hypothetical protein TcasGA2_TC015408 [Tribolium castaneum]	Mevalonate kinase OS=Bos taurus GN=MVK PE=2 SV=1	Putative uncharacterized protein GLEAN_15408 OS=Tribolium castaneum GN=GLEAN_15408 PE=3 SV=1	COG1577|Mevalonate kinase|I|Lipid transport and metabolism ;	GO:0004496; mevalonate kinase activity; Molecular Function GO:0005524; ATP binding; Molecular Function GO:0005737; cytoplasm; Cellular Component GO:0008152; metabolic process; Biological Process GO:0008299; isoprenoid biosynthetic process; Biological Process GO:0016301; kinase activity; Molecular Function GO:0016773; phosphotransferase activity, alcohol group as acceptor; Molecular Function	IPR002634; BolA protein IPR006204; GHMP kinase N-terminal domain IPR006205; Mevalonate kinase IPR006206; Mevalonate/galactokinase IPR013750; GHMP kinase, C-terminal domain IPR014721; Ribosomal protein S5 domain 2-type fold, subgroup IPR020568; Ribosomal protein S5 domain 2-type fold	K00869 E2.7.1.36, MVK, mvaK1; mevalonate kinase [EC:2.7.1.36] [EC:2.7.1.36] Metabolism; Metabolism of terpenoids and polyketides; Prenyltransferases [BR:ko01006] Metabolism; Metabolism of terpenoids and polyketides; Terpenoid backbone biosynthesis [PATH:ko00900] Cellular Processes; Transport and catabolism; Peroxisome [PATH:ko04146]
LOCMI10595	12.8906	15.6709	12.9199	18.2408	16.2616	20.1947	0.39751	3.85367	0.0358385	0.473306	Phosphomevalonate kinase	PMVK	Phosphomevalonate kinase [Zootermopsis nevadensis]	Phosphomevalonate kinase OS=Homo sapiens GN=PMVK PE=1 SV=3	Putative uncharacterized protein (Fragment) OS=Solenopsis invicta GN=SINV_14785 PE=4 SV=1	NA	GO:0004631; phosphomevalonate kinase activity; Molecular Function GO:0005737; cytoplasm; Cellular Component GO:0006695; cholesterol biosynthetic process; Biological Process	IPR005919; Higher eukaryotic phosphomevalonate kinase	K13273 PMVK; phosphomevalonate kinase [EC:2.7.4.2] [EC:2.7.4.2] Metabolism; Metabolism of terpenoids and polyketides; Prenyltransferases [BR:ko01006] Metabolism; Metabolism of terpenoids and polyketides; Terpenoid backbone biosynthesis [PATH:ko00900] Cellular Processes; Transport and catabolism; Peroxisome [PATH:ko04146]
LOCMI17114	0.790832	1.82711	1.00793	0.588414	0.416964	0.853297	-0.958027	2.48115	0.037597	0.478611	Putative uncharacterized protein	LOCMI17114	hypothetical protein L798_04928, partial [Zootermopsis nevadensis]	Sarcoplasmic calcium-binding proteins I, III, and IV OS=Branchiostoma lanceolatum PE=1 SV=2	Putative uncharacterized protein OS=Camponotus floridanus GN=EAG_16062 PE=4 SV=1	NA	GO:0005509; calcium ion binding; Molecular Function	IPR011992; EF-hand domain pair IPR018247; EF-Hand 1, calcium-binding site	NA
LOCMI15805	788.223	721.004	706.287	1006.63	862.031	939.267	0.341868	7.90343	0.066116	0.627326	Hydroxymethylglutaryl-CoA synthase 1	HMGCS-1	Hydroxymethylglutaryl-CoA synthase 1 [Zootermopsis nevadensis]	Hydroxymethylglutaryl-CoA synthase 1 OS=Blattella germanica GN=HMGCS-1 PE=2 SV=1	3-hydroxy-3-methylglutaryl coenzyme A synthase OS=Nasutitermes takasagoensis GN=HMGS PE=2 SV=2	COG3425|3-hydroxy-3-methylglutaryl CoA synthase|I|Lipid transport and metabolism ;	GO:0003824; catalytic activity; Molecular Function GO:0004421; hydroxymethylglutaryl-CoA synthase activity; Molecular Function GO:0008152; metabolic process; Biological Process GO:0008299; isoprenoid biosynthetic process; Biological Process	IPR000590; Hydroxymethylglutaryl-coenzyme A synthase, active site IPR010122; Hydroxymethylglutaryl-CoA synthase, eukaryotic IPR013528; Hydroxymethylglutaryl-coenzyme A synthase, N-terminal IPR013746; Hydroxymethylglutaryl-coenzyme A synthase C-terminal IPR016038; Thiolase-like, subgroup IPR016039; Thiolase-like	K01641 E2.3.3.10; hydroxymethylglutaryl-CoA synthase [EC:2.3.3.10] [EC:2.3.3.10] Metabolism; Carbohydrate metabolism; Butanoate metabolism [PATH:ko00650] Metabolism; Lipid metabolism; Synthesis and degradation of ketone bodies [PATH:ko00072] Metabolism; Amino acid metabolism; Valine, leucine and isoleucine degradation [PATH:ko00280] Metabolism; Metabolism of terpenoids and polyketides; Prenyltran…
LOCMI16258	44.0494	34.4339	53.8786	13.2393	18.68	40.8872	-0.8613	3.27374	0.0744025	0.658017	Phospholipid hydroperoxide glutathione peroxidase, mitochondrial	GPX4	Phospholipid hydroperoxide glutathione peroxidase, mitochondrial [Zootermopsis nevadensis]	Phospholipid hydroperoxide glutathione peroxidase, mitochondrial OS=Callithrix jacchus GN=GPX4 PE=2 SV=2	Glutathione peroxidase OS=Harpegnathos saltator GN=EAI_09696 PE=3 SV=1	COG0386|Glutathione peroxidase|O|Posttranslational modification, protein turnover, chaperones ;	GO:0004602; glutathione peroxidase activity; Molecular Function GO:0006979; response to oxidative stress; Biological Process GO:0055114; oxidation-reduction process; Biological Process	IPR000889; Glutathione peroxidase IPR012336; Thioredoxin-like fold	K00432 E1.11.1.9; glutathione peroxidase [EC:1.11.1.9] [EC:1.11.1.9] Metabolism; Lipid metabolism; Arachidonic acid metabolism [PATH:ko00590] Metabolism; Metabolism of other amino acids; Glutathione metabolism [PATH:ko00480] Organismal Systems; Endocrine system; Thyroid hormone synthesis [PATH:ko04918]
LOCMI16359	138.079	127.195	125.442	272.258	244.77	255.016	1.27286	5.69006	0.00878278	0.0693191	Acetyl-CoA acetyltransferase, cytosolic	Acat2	PREDICTED: acetyl-CoA acetyltransferase, cytosolic [Nasonia vitripennis]	Acetyl-CoA acetyltransferase, cytosolic OS=Mus musculus GN=Acat2 PE=1 SV=2	Uncharacterized protein OS=Nasonia vitripennis PE=3 SV=1	COG0183|Acetyl-CoA acetyltransferase|I|Lipid transport and metabolism ;	GO:0003824; catalytic activity; Molecular Function GO:0008152; metabolic process; Biological Process GO:0016747; transferase activity, transferring acyl groups other than amino-acyl groups; Molecular Function	IPR002155; Thiolase IPR016038; Thiolase-like, subgroup IPR016039; Thiolase-like IPR020610; Thiolase, active site IPR020613; Thiolase, conserved site IPR020615; Thiolase, acyl-enzyme intermediate active site IPR020616; Thiolase, N-terminal IPR020617; Thiolase, C-terminal	K00626 E2.3.1.9, atoB; acetyl-CoA C-acetyltransferase [EC:2.3.1.9] [EC:2.3.1.9] Metabolism; Overview; Carbon metabolism [PATH:ko01200] Metabolism; Overview; Fatty acid metabolism [PATH:ko01212] Metabolism; Carbohydrate metabolism; Pyruvate metabolism [PATH:ko00620] Metabolism; Carbohydrate metabolism; Glyoxylate and dicarboxylate metabolism [PATH:ko00630] Metabolism; Carbohydrate metabolism; Prop…
LOCMI16337	773.355	733.724	739.823	999.789	783.641	923.196	0.26859	7.77963	0.118069	0.784408	Farnesyl pyrophosphate synthase	FDPS	Farnesyl pyrophosphate synthetase [Zootermopsis nevadensis]	Farnesyl pyrophosphate synthase OS=Gallus gallus GN=FDPS PE=1 SV=2	Mitochondrial farnesyl diphosphate synthase OS=Aphis gossypii GN=FPS PE=3 SV=3	COG0142|Geranylgeranyl pyrophosphate synthase|H|Coenzyme transport and metabolism ;	GO:0008299; isoprenoid biosynthetic process; Biological Process	IPR000092; Polyprenyl synthetase IPR008949; Terpenoid synthase	K00787 FDPS; farnesyl diphosphate synthase [EC:2.5.1.1 2.5.1.10] [EC:2.5.1.1 2.5.1.10] Metabolism; Metabolism of terpenoids and polyketides; Prenyltransferases [BR:ko01006] Metabolism; Metabolism of terpenoids and polyketides; Terpenoid backbone biosynthesis [PATH:ko00900] Human Diseases; Infectious diseases; HTLV-I infection [PATH:ko05166] Human Diseases; Infectious diseases; Influenza A [PATH:k…
LOCMI16177	870.311	761.411	775.559	1224.64	998.795	963.657	0.404833	7.86915	0.13701	0.817482	Probable cytochrome P450 303a1	Cyp303a1	methyl farnesoate epoxidase [Schistocerca gregaria]	Probable cytochrome P450 303a1 OS=Drosophila melanogaster GN=Cyp303a1 PE=2 SV=1	Methyl farnesoate epoxidase OS=Schistocerca gregaria GN=CYP15A1 PE=2 SV=1	COG2124|Cytochrome P450|Q|Secondary metabolites biosynthesis, transport and catabolism ;	GO:0005506; iron ion binding; Molecular Function GO:0016705; oxidoreductase activity, acting on paired donors, with incorporation or reduction of molecular oxygen; Molecular Function GO:0020037; heme binding; Molecular Function GO:0055114; oxidation-reduction process; Biological Process	IPR001128; Cytochrome P450 IPR002401; Cytochrome P450, E-class, group I IPR017972; Cytochrome P450, conserved site	K14937 CYP15A1; cytochrome P450, family 15, subfamily A, polypeptide 1 K14937 Metabolism; Metabolism of terpenoids and polyketides; Insect hormone biosynthesis [PATH:ko00981]
LOCMI15548	1.26533	1.54601	1.46609	1.02972	0.166785	1.20884	-0.801996	2.84368	0.152343	0.847254	Esterase FE4	Ces	Esterase FE4 [Zootermopsis nevadensis]	Venom carboxylesterase-6 OS=Apis mellifera PE=2 SV=1	Juvenile hormone esterase (Fragment) OS=Gryllus assimilis GN=Jhe PE=2 SV=1	COG2272|Carboxylesterase type B|I|Lipid transport and metabolism ;	NA	IPR002018; Carboxylesterase, type B IPR019819; Carboxylesterase type B, conserved site IPR019826; Carboxylesterase type B, active site	K01063 JHE; juvenile-hormone esterase [EC:3.1.1.59] [EC:3.1.1.59] Metabolism; Metabolism of terpenoids and polyketides; Insect hormone biosynthesis [PATH:ko00981]
LOCMI14893	20.878	22.2064	21.3499	23.9043	28.2701	24.1768	0.243305	4.18062	0.166675	0.876067	Juvenile hormone-inducible protein, putative	JhI	Juvenile hormone-inducible protein, putative [Aedes aegypti] gb|EAT44634.1| AAEL004023-PA [Aedes aegypti]	NA	AAEL004023-PA OS=Aedes aegypti GN=AAEL004023 PE=4 SV=1	NA	GO:0016772; transferase activity, transferring phosphorus-containing groups; Molecular Function	IPR004119; Protein of unknown function DUF227 IPR011009; Protein kinase-like domain IPR015897; CHK kinase-like	NA
LOCMI16691	62.5548	78.425	77.4276	59.6505	61.2937	62.504	-0.251597	6.3714	0.390192	1	Juvenile hormone epoxide hydrolase 1	EH1	Juvenile hormone epoxide hydrolase 1 [Zootermopsis nevadensis]	Juvenile hormone epoxide hydrolase 1 OS=Ctenocephalides felis GN=EH1 PE=1 SV=3	Putative uncharacterized protein OS=Tribolium castaneum GN=TcasGA2_TC003438 PE=4 SV=1	COG0596|Predicted hydrolases or acyltransferases (alpha/beta hydrolase superfamily) |R|General function prediction only ;	GO:0003824; catalytic activity; Molecular Function GO:0033961; cis-stilbene-oxide hydrolase activity; Molecular Function	IPR000073; Alpha/beta hydrolase fold-1 IPR000639; Epoxide hydrolase-like IPR010497; Epoxide hydrolase, N-terminal IPR016292; Epoxide hydrolase	NA
LOCMI15132	32.8195	39.3531	16.4018	37.2172	36.3592	26.95	0.179279	4.91803	0.485012	1	Farnesyl pyrophosphate synthase	FDPS	Farnesyl pyrophosphate synthetase [Zootermopsis nevadensis]	Farnesyl pyrophosphate synthase OS=Gallus gallus GN=FDPS PE=1 SV=2	Uncharacterized protein OS=Nasonia vitripennis PE=3 SV=1	COG0142|Geranylgeranyl pyrophosphate synthase|H|Coenzyme transport and metabolism ;	GO:0008299; isoprenoid biosynthetic process; Biological Process	IPR000092; Polyprenyl synthetase IPR008949; Terpenoid synthase	K00787 FDPS; farnesyl diphosphate synthase [EC:2.5.1.1 2.5.1.10] [EC:2.5.1.1 2.5.1.10] Metabolism; Metabolism of terpenoids and polyketides; Prenyltransferases [BR:ko01006] Metabolism; Metabolism of terpenoids and polyketides; Terpenoid backbone biosynthesis [PATH:ko00900] Human Diseases; Infectious diseases; HTLV-I infection [PATH:ko05166] Human Diseases; Infectious diseases; Influenza A [PATH:k…
LOCMI17615	774.031	937.165	852.099	1610.56	1847.1	1423.56	1.17388	8.17981	0.0529436	0.026	Trans-aconitate 2-methyltransferase	tam	juvenile hormone acid methyltransferase [Schistocerca gregaria]	Trans-aconitate 2-methyltransferase OS=Variovorax paradoxus (strain S110) GN=tam PE=3 SV=1	Juvenile hormone acid methyltransferase OS=Schistocerca gregaria GN=JHAMT PE=2 SV=1	COG0500|SAM-dependent methyltransferases|QR|Secondary metabolites biosynthesis, transport and catabolism ; General function prediction only ;	NA	NA	K10718 JHAMT; juvenile hormone acid methyltransferase [EC:2.1.1.-] [EC:2.1.1.-] Metabolism; Metabolism of terpenoids and polyketides; Insect hormone biosynthesis [PATH:ko00981]
LOCMI04730	23.5668	25.4389	21.7164	22.2862	22.0157	21.8302	-0.0982783	4.5261	0.59366	1	Juvenile hormone epoxide hydrolase 1	EH1	Juvenile hormone epoxide hydrolase 1 [Zootermopsis nevadensis]	Juvenile hormone epoxide hydrolase 1 OS=Ctenocephalides felis GN=EH1 PE=1 SV=3	Juvenile hormone epoxide hydrolase 1 (Fragment) OS=Anoplophora glabripennis GN=HYEP1 PE=4 SV=1	COG0596|Predicted hydrolases or acyltransferases (alpha/beta hydrolase superfamily) |R|General function prediction only ;	GO:0003824; catalytic activity; Molecular Function GO:0033961; cis-stilbene-oxide hydrolase activity; Molecular Function	IPR000073; Alpha/beta hydrolase fold-1 IPR000639; Epoxide hydrolase-like IPR010497; Epoxide hydrolase, N-terminal IPR016292; Epoxide hydrolase	K10719 JHEH; juvenile hormone epoxide hydrolase K10719 Metabolism; Metabolism of terpenoids and polyketides; Insect hormone biosynthesis [PATH:ko00981]
LOCMI05943	12.337	4.70831	12.1868	11.7683	9.67356	10.0973	0.114805	3.61877	0.743844	1	Dehydrogenase/reductase SDR family member 11	Dhrs11	Dehydrogenase/reductase SDR family member 11 [Zootermopsis nevadensis]	Dehydrogenase/reductase SDR family member 11 OS=Mus musculus GN=Dhrs11 PE=2 SV=1	Dehydrogenase/reductase SDR family member 11 OS=Camponotus floridanus GN=EAG_14463 PE=3 SV=1	COG4221|Short-chain alcohol dehydrogenase of unknown specificity|R|General function prediction only ;	NA	IPR016040; NAD(P)-binding domain	NA
LOCMI16251	48.0035	60.9972	43.3411	51.854	44.1148	47.0024	-0.092043	5.75006	0.747597	1	Glutathione peroxidase	GPX1	Phospholipid hydroperoxide glutathione peroxidase, mitochondrial [Zootermopsis nevadensis]	Glutathione peroxidase OS=Schistosoma mansoni GN=GPX1 PE=1 SV=2	Glutathione peroxidase OS=Harpegnathos saltator GN=EAI_09696 PE=3 SV=1	COG0386|Glutathione peroxidase|O|Posttranslational modification, protein turnover, chaperones ;	GO:0004602; glutathione peroxidase activity; Molecular Function GO:0006979; response to oxidative stress; Biological Process GO:0055114; oxidation-reduction process; Biological Process	IPR000889; Glutathione peroxidase IPR012336; Thioredoxin-like fold	NA
LOCMI15560	1.4235	3.37312	1.09956	2.86852	1.91803	1.84881	0.15827	0.663751	0.801233	1	carboxylesterase	Ces4A	carboxylesterase [Locusta migratoria]	Esterase FE4 OS=Myzus persicae PE=1 SV=1	Carboxylesterase A4 OS=Locusta migratoria GN=CesA4 PE=2 SV=1	COG2272|Carboxylesterase type B|I|Lipid transport and metabolism ;	NA	IPR002018; Carboxylesterase, type B IPR019819; Carboxylesterase type B, conserved site IPR019826; Carboxylesterase type B, active site	NA
LOCMI17120	1.81891	2.45957	1.64935	2.2801	2.83535	1.27995	0.10363	4.13906	0.899146	1	Juvenile hormone epoxide hydrolase 1	EH1	Juvenile hormone epoxide hydrolase 1 [Zootermopsis nevadensis]	Juvenile hormone epoxide hydrolase 1 OS=Ctenocephalides felis GN=EH1 PE=1 SV=3	Putative uncharacterized protein OS=Tribolium castaneum GN=TcasGA2_TC003438 PE=4 SV=1	COG0596|Predicted hydrolases or acyltransferases (alpha/beta hydrolase superfamily) |R|General function prediction only ;	GO:0003824; catalytic activity; Molecular Function GO:0033961; cis-stilbene-oxide hydrolase activity; Molecular Function	IPR000073; Alpha/beta hydrolase fold-1 IPR000639; Epoxide hydrolase-like IPR010497; Epoxide hydrolase, N-terminal IPR016292; Epoxide hydrolase	K10719 JHEH; juvenile hormone epoxide hydrolase K10719 Metabolism; Metabolism of terpenoids and polyketides; Insect hormone biosynthesis [PATH:ko00981]
LOCMI16310	10.3599	8.57334	6.23086	6.61966	11.4248	7.39524	0.0136727	5.10445	0.980006	1	Dehydrogenase/reductase SDR family member 11	DHRS11	Dehydrogenase/reductase SDR family member 11 [Zootermopsis nevadensis]	Dehydrogenase/reductase SDR family member 11 OS=Bos taurus GN=DHRS11 PE=2 SV=1	Enkurin OS=Coptotermes formosanus PE=2 SV=1	COG4221|Short-chain alcohol dehydrogenase of unknown specificity|R|General function prediction only ;	GO:0008152; metabolic process; Biological Process GO:0016491; oxidoreductase activity; Molecular Function	IPR002198; Short-chain dehydrogenase/reductase SDR IPR002347; Glucose/ribitol dehydrogenase IPR016040; NAD(P)-binding domain	NA
LOCMI16298	260.737	286.645	238.697	267.875	298.379	220.791	0.00155314	7.55244	0.994157	1	Acetyl-CoA acetyltransferase A, mitochondrial	acat1-a	Acetyl-CoA acetyltransferase, mitochondrial [Camponotus floridanus]	Acetyl-CoA acetyltransferase A, mitochondrial OS=Xenopus laevis GN=acat1-a PE=2 SV=1	Acetyl-CoA acetyltransferase, mitochondrial OS=Camponotus floridanus GN=EAG_03790 PE=3 SV=1	COG0183|Acetyl-CoA acetyltransferase|I|Lipid transport and metabolism ;	GO:0003824; catalytic activity; Molecular Function GO:0008152; metabolic process; Biological Process GO:0016747; transferase activity, transferring acyl groups other than amino-acyl groups; Molecular Function	IPR002155; Thiolase IPR016038; Thiolase-like, subgroup IPR016039; Thiolase-like IPR020610; Thiolase, active site IPR020613; Thiolase, conserved site IPR020615; Thiolase, acyl-enzyme intermediate active site IPR020616; Thiolase, N-terminal IPR020617; Thiolase, C-terminal	K00626 E2.3.1.9, atoB; acetyl-CoA C-acetyltransferase [EC:2.3.1.9] [EC:2.3.1.9] Metabolism; Overview; Carbon metabolism [PATH:ko01200] Metabolism; Overview; Fatty acid metabolism [PATH:ko01212] Metabolism; Carbohydrate metabolism; Pyruvate metabolism [PATH:ko00620] Metabolism; Carbohydrate metabolism; Glyoxylate and dicarboxylate metabolism [PATH:ko00630] Metabolism; Carbohydrate metabolism; Prop…
LOCMI15559	0	0.140547	0.0916303	0.147103	0	0.142216	0.300974	-2.40332	1	1	carboxylesterase	Ces4A	carboxylesterase [Locusta migratoria]	Esterase FE4 OS=Myzus persicae PE=1 SV=1	Carboxylesterase A4 OS=Locusta migratoria GN=CesA4 PE=2 SV=1	COG2272|Carboxylesterase type B|I|Lipid transport and metabolism ;	NA	IPR002018; Carboxylesterase, type B IPR019826; Carboxylesterase type B, active site	NA
LOCMI05376	0	0	0	0.0735517	0	0	1.8445	-1.3277	1	1	Dehydrogenase/reductase SDR family member 11	DHRS11	PREDICTED: dehydrogenase/reductase SDR family member 11-like [Stegastes partitus]	Dehydrogenase/reductase SDR family member 11 OS=Bos taurus GN=DHRS11 PE=2 SV=1	Uncharacterized protein (Fragment) OS=Danio rerio GN=dhrs11b PE=3 SV=1	COG4221|Short-chain alcohol dehydrogenase of unknown specificity|R|General function prediction only ;	NA	IPR002347; Glucose/ribitol dehydrogenase IPR016040; NAD(P)-binding domain	NA
LOCMI17476	0	0	0	0	0	0	0	-1.79245	1	1	Hydroxymethylglutaryl-CoA synthase A	hgsA	hydroxymethylglutaryl-CoA synthase 1 [Capsaspora owczarzaki ATCC 30864] gb|EFW43455.1| hydroxymethylglutaryl-CoA synthase 1 [Capsaspora owczarzaki ATCC 30864]	Hydroxymethylglutaryl-CoA synthase A OS=Dictyostelium discoideum GN=hgsA PE=1 SV=2	Hydroxymethylglutaryl-CoA synthase 1 OS=Capsaspora owczarzaki (strain ATCC 30864) GN=CAOG_01499 PE=4 SV=1	COG3425|3-hydroxy-3-methylglutaryl CoA synthase|I|Lipid transport and metabolism ;	GO:0003824; catalytic activity; Molecular Function GO:0004421; hydroxymethylglutaryl-CoA synthase activity; Molecular Function GO:0008152; metabolic process; Biological Process GO:0008299; isoprenoid biosynthetic process; Biological Process	IPR013746; Hydroxymethylglutaryl-coenzyme A synthase C-terminal IPR016038; Thiolase-like, subgroup IPR016039; Thiolase-like	NA
